# Supplementary material
Source: PubMed Central journal article supplement (PMC8524355)
Supplement: jamainternmed-e215983-s001.pdf [file jamainternmed-e215983-s001.pdf]

## Supplementary Online Content

Fu M, Naci H, Booth CM, et al. Real-world use of and spending on new oral targeted cancer drugs in the US, 2011-2018. *JAMA Intern Med*. Published online October 18, 2021. doi:10.1001/jamainternmed.2021.5983

**eTable 1.** Definitions of Evidence of OS Benefit in FDA-Approved Labels

**eTable 2.** Indications Approved by the FDA for 44 Oral Targeted Cancer Drugs, 2011-2018

**eTable 3.** Trials of Drugs With Information on OS Benefit Reported in FDA-Approved Labels, 2011-2018

**eTable 4.** Magnitude of OS Benefit and Spending Associated With Oral Targeted Cancer Drugs With Documented OS Benefit, as Reported in FDA-Approved Labels in 2018

**eTable 5.** Spending Associated With Dispensing Events for 44 Oral Targeted Cancer Drugs in 2018

**eTable 6.** Number of Members per Year in the IBM MarketScan Research Databases, 2011-2018

**eFigure 1.** Annual and Cumulative Numbers of Patients Exposed to and Spending on 44 Oral Targeted Cancer Drugs, by FDA Orphan Designation and Accelerated Approval Pathway

**eFigure 2.** Annual and Cumulative Inflation-Adjusted Spending on 44 Oral Targeted Cancer Drugs

**eBox 1.** Brief summary of evidence documented in FDA labels for the top 3 drugs by spending in 2018.

This supplementary material has been provided by the authors to give readers additional information about their work.

**eTable 1.** Definitions of evidence of OS benefit in FDA-approved labels.

1. With documented OS benefit:

| Category                                                                 | Detailed definition <sup>1</sup>                                                                                                                                                                                                                                                                                                                                                                                                                                                                                                                                                                                                                                                                                                                                                                                                                                                                                                                                                                                            |
|--------------------------------------------------------------------------|-----------------------------------------------------------------------------------------------------------------------------------------------------------------------------------------------------------------------------------------------------------------------------------------------------------------------------------------------------------------------------------------------------------------------------------------------------------------------------------------------------------------------------------------------------------------------------------------------------------------------------------------------------------------------------------------------------------------------------------------------------------------------------------------------------------------------------------------------------------------------------------------------------------------------------------------------------------------------------------------------------------------------------|
| Confirmed or inferred statistically significant overall survival benefit | <p>FDA label included a statement referring to <b>final or interim trial results</b> saying that the drug has (statistically significant) (overall) survival benefits in trials with patients for whom the drug is indicated <b>or</b> showed numerical data on overall survival in final or interim analyses that allow inference of statistically significant OS benefit:</p> <ol style="list-style-type: none"> <li>a. FDA label included a statement that the drug does have (statistically significant) (overall) survival benefits in final or interim analyses</li> <li>b. FDA label presented numerical OS data indicating statistically significant OS benefit with at least one of the following: <ul style="list-style-type: none"> <li>• Survival difference (Kaplan Meier curve) – measured by HR: 95% CI&lt;1</li> <li>• Number/proportion of deaths by defined time – p&lt;0.05</li> <li>• Time to death (months) – p&lt;0.05</li> <li>• Median overall survival (months) – p&lt;0.05</li> </ul> </li> </ol> |

2. Without documented OS benefit:

| Category                                                                         | Detailed definition                                                                                                                                                                                                                                                                                                                                                                                                                                                                                                                                                                                                                                                                                                                                                                                                                                                                                                     |
|----------------------------------------------------------------------------------|-------------------------------------------------------------------------------------------------------------------------------------------------------------------------------------------------------------------------------------------------------------------------------------------------------------------------------------------------------------------------------------------------------------------------------------------------------------------------------------------------------------------------------------------------------------------------------------------------------------------------------------------------------------------------------------------------------------------------------------------------------------------------------------------------------------------------------------------------------------------------------------------------------------------------|
| Confirmed or inferred lack of statistically significant overall survival benefit | <p>FDA label included a statement that the drug did not have (statistically significant) (overall) survival benefits <b>or</b> showed numerical data on overall survival, in final or interim analyses.</p> <ol style="list-style-type: none"> <li>a. FDA label included a statement that the drug did not have (statistically significant) (overall) survival benefits in final or interim analyses</li> <li>b. FDA label showed numerical data that allow inference of lack of statistically significant OS benefit with at least one of the following (not including non-inferiority designs): <ul style="list-style-type: none"> <li>• Survival difference (Kaplan Meier curve) – measured by HR: 95% CI includes 1</li> <li>• Number/proportion of deaths by defined time – p&gt;0.05</li> <li>• Time to death (months) – p&gt;0.05</li> <li>• Median overall survival (months) – p&gt;0.05</li> </ul> </li> </ol> |

<sup>1</sup> Naci H, Guan XD, Woloshin S, Xu Z, Wagner AK. Communication of Survival Data in US Food and Drug Administration-Approved Labeling of Cancer Drugs. JAMA Intern Med. 2021 Jul 12:e213505.haob.

| <b>Category</b>                                                                                                              | <b>Detailed definition</b>                                                                                                                                                                                                                                                                                                                                                                                                               |
|------------------------------------------------------------------------------------------------------------------------------|------------------------------------------------------------------------------------------------------------------------------------------------------------------------------------------------------------------------------------------------------------------------------------------------------------------------------------------------------------------------------------------------------------------------------------------|
| Overall survival data obtained from a trial with non-inferiority design                                                      | OS data were obtained from a trial with non-inferiority design.                                                                                                                                                                                                                                                                                                                                                                          |
| Overall survival not mentioned, or overall survival results not reported or not reported in a way that can support inference | <ul style="list-style-type: none"> <li>a) The label for the drug-indication pair did not mention (overall) survival (not in text, no data in figures or tables) except to say that it was not measured.</li> <li>b) The label included overall survival among trial endpoints but results are not reported.</li> <li>c) The label included overall survival but results are not reported in a way that can support inference.</li> </ul> |

**eTable 2.** Indications approved by the FDA for 44 oral targeted cancer drugs,\* 2011-2018.

| Drug number | Generic name            | Brand name | Date of indication approval | New indication approved                                                                                                                                                                                                                                                                                                                                                                                                                                                                                                      | Line of therapy: adjuvant, first line, second line+, any line** |
|-------------|-------------------------|------------|-----------------------------|------------------------------------------------------------------------------------------------------------------------------------------------------------------------------------------------------------------------------------------------------------------------------------------------------------------------------------------------------------------------------------------------------------------------------------------------------------------------------------------------------------------------------|-----------------------------------------------------------------|
| 1           | Abemaciclib             | VERZENIO   | 20170928                    | VERZENIO™ is a kinase inhibitor indicated: in combination with fulvestrant for the treatment of women with hormone receptor (HR)-positive, human epidermal growth factor receptor 2 (HER2)-negative advanced or metastatic breast cancer with disease progression following endocrine therapy; as monotherapy for the treatment of adult patients with HRpositive, HER2-negative advanced or metastatic breast cancer with disease progression following endocrine therapy and prior chemotherapy in the metastatic setting. | Second line+                                                    |
| 2           | Abiraterone acetate     | ZYTIGA     | 20110428                    | ZYTIGA is a CYP17 inhibitor indicated for use in combination with prednisone for the treatment of patients with metastatic castration-resistant prostate cancer who have received prior chemotherapy containing docetaxel.                                                                                                                                                                                                                                                                                                   | Second line+                                                    |
| 2           | Abiraterone acetate     | ZYTIGA     | 20121210                    | In combination with prednisone for the treatment of patients with metastatic castration-resistant prostate cancer (CRPC).                                                                                                                                                                                                                                                                                                                                                                                                    | First line                                                      |
| 2           | Abiraterone acetate     | ZYTIGA     | 20180207                    | In combination with prednisone for the treatment of patients with metastatic castration-sensitive prostate cancer (CSPC).                                                                                                                                                                                                                                                                                                                                                                                                    | First line                                                      |
| 3           | Acalabrutinib           | CALQUENCE  | 20171031                    | CALQUENCE is a kinase inhibitor indicated for the treatment of adult patients with mantle cell lymphoma (MCL) who have received at least one prior therapy. This indication is approved under accelerated approval based on overall response rate. Continued approval for this indication may be contingent upon verification and description of clinical benefit in confirmatory trials.                                                                                                                                    | Second line+                                                    |
| 4           | Afatinib dimaleate      | GILOTRIF   | 20130712                    | GILOTRIF is a kinase inhibitor indicated for the first-line treatment of patients with metastatic non-small cell lung cancer (NSCLC) whose tumors have epidermal growth factor receptor (EGFR) exon 19 deletions or exon 21 (L858R) substitution mutations as detected by an FDA-approved test. Limitation of Use: Safety and efficacy of GILOTRIF have not been established in patients whose tumors have other EGFR mutations.                                                                                             | First line                                                      |
| 4           | Afatinib dimaleate      | GILOTRIF   | 20160415                    | Treatment of patients with metastatic, squamous NSCLC progressing after platinum-based chemotherapy.                                                                                                                                                                                                                                                                                                                                                                                                                         | Second line+                                                    |
| 5           | Alectinib hydrochloride | ALECENSA   | 20151211                    | ALECENSA is a kinase inhibitor indicated for the treatment of patients with anaplastic lymphoma kinase (ALK)-positive, metastatic non-small cell lung cancer (NSCLC) who have progressed on or are intolerant to crizotinib. This indication is approved under accelerated approval based on tumor response rate and duration of response. Continued approval for this indication may be contingent upon verification and description of clinical benefit in confirmatory trials.                                            | Second line+                                                    |
| 6           | Apalutamide             | ERLEADA    | 20180214                    | ERLEADA is an androgen receptor inhibitor indicated for the treatment of patients with non-metastatic castration-resistant prostate cancer.                                                                                                                                                                                                                                                                                                                                                                                  | First line                                                      |
| 7           | Axitinib                | INLYTA     | 20120127                    | INLYTA is a kinase inhibitor indicated for the treatment of advanced renal cell carcinoma after failure of one prior systemic therapy.                                                                                                                                                                                                                                                                                                                                                                                       | Second line+                                                    |
| 8           | Binimetinib             | MEKTOVI    | 20180627                    | MEKTOVI is a kinase inhibitor indicated, in combination with encorafenib, for the treatment of patients with unresectable or metastatic melanoma with a BRAF V600E or V600K mutation, as detected by an FDA-approved test.                                                                                                                                                                                                                                                                                                   | Any line                                                        |

| Drug number | Generic name          | Brand name | Date of indication approval | New indication approved                                                                                                                                                                                                                                                                                                                                                                                                                                                                                                                                          | Line of therapy: adjuvant, first line, second line+, any line** |
|-------------|-----------------------|------------|-----------------------------|------------------------------------------------------------------------------------------------------------------------------------------------------------------------------------------------------------------------------------------------------------------------------------------------------------------------------------------------------------------------------------------------------------------------------------------------------------------------------------------------------------------------------------------------------------------|-----------------------------------------------------------------|
| 9           | Bosutinib monohydrate | BOSULIF    | 20120904                    | BOSULIF is a kinase inhibitor indicated for the treatment of adult patients with chronic, accelerated, or blast phase Ph+ chronic myelogenous leukemia (CML) with resistance or intolerance to prior therapy.                                                                                                                                                                                                                                                                                                                                                    | Second line+                                                    |
| 10          | Brigatinib            | ALUNBRIG   | 20170428                    | ALUNBRIG is a kinase inhibitor indicated for the treatment of patients with anaplastic lymphoma kinase (ALK)-positive metastatic non-small cell lung cancer (NSCLC) who have progressed on or are intolerant to crizotinib. Continued approval for this indication may be contingent upon verification and description of clinical benefit in a confirmatory trial. This indication is approved under accelerated approval based on tumor response rate and duration of response.                                                                                | Second line+                                                    |
| 11          | Cabozantinib s-malate | COMETRIQ   | 20121129                    | COMETRIQ is a kinase inhibitor indicated for the treatment of patients with progressive, metastatic medullary thyroid cancer (MTC).                                                                                                                                                                                                                                                                                                                                                                                                                              | Second line+                                                    |
| 11          | Cabozantinib s-malate | CABOMETYX  | 20160425                    | CABOMETYX is a kinase inhibitor indicated for the treatment of patients with advanced renal cell carcinoma (RCC) who have received prior antiangiogenic therapy.                                                                                                                                                                                                                                                                                                                                                                                                 | Second line+                                                    |
| 12          | Ceritinib             | ZYKADIA    | 20140429                    | ZYKADIA is a kinase inhibitor indicated for the treatment of patients with anaplastic lymphoma kinase (ALK)-positive metastatic non-small cell lung cancer (NSCLC) who have progressed on or are intolerant to crizotinib. This indication is approved under accelerated approval based on tumor response rate and duration of response. An improvement in survival or disease-related symptoms has not been established. Continued approval for this indication may be contingent upon verification and description of clinical benefit in confirmatory trials. | Second line+                                                    |
| 13          | Cobimetinib fumarate  | COTELLIC   | 20151110                    | COTELLIC is a kinase inhibitor indicated for the treatment of patients with unresectable or metastatic melanoma with a BRAF V600E or V600K mutation, in combination with vemurafenib.<br>Limitation of Use: COTELLIC is not indicated for treatment of patients with wild-type BRAF melanoma.                                                                                                                                                                                                                                                                    | Any line                                                        |
| 14          | Crizotinib            | XALKORI    | 20110826                    | XALKORI is a kinase inhibitor indicated for the treatment of patients with metastatic non-small cell lung cancer (NSCLC) whose tumors are anaplastic lymphoma kinase (ALK) or ROS1-positive as detected by an FDA-approved test.                                                                                                                                                                                                                                                                                                                                 | First line                                                      |
| 15          | Dabrafenib mesylate   | TAFINLAR   | 20130529                    | TAFINLAR is a kinase inhibitor indicated for the treatment of patients with unresectable or metastatic melanoma with BRAF V600E mutation as detected by an FDA-approved test.<br>Limitation of use: TAFINLAR is not indicated for treatment of patients with wild-type BRAF melanoma.                                                                                                                                                                                                                                                                            | First line                                                      |
| 15          | Dabrafenib mesylate   | TAFINLAR   | 20140109                    | TAFINLAR in combination with trametinib is indicated for the treatment of patients with unresectable or metastatic melanoma with BRAF V600E or V600K mutations as detected by an FDA-approved test. The use in combination is based on the demonstration of durable response rate. Improvement in disease-related symptoms or overall survival has not been demonstrated for TAFINLAR in combination with trametinib.                                                                                                                                            | First line                                                      |
| 15          | Dabrafenib mesylate   | TAFINLAR   | 20170622                    | TAFINLAR is indicated, in combination with trametinib, for the treatment of patients with: metastatic non-small cell lung cancer (NSCLC) with BRAF V600E mutation as detected by an FDA-approved test.                                                                                                                                                                                                                                                                                                                                                           | Second line+                                                    |
| 15          | Dabrafenib mesylate   | TAFINLAR   | 20180430                    | TAFINLAR is indicated, in combination with trametinib, for: the adjuvant treatment of patients with melanoma with BRAF V600E or V600K mutations, as detected by an FDA-approved test, and involvement of lymph node(s), following complete resection.                                                                                                                                                                                                                                                                                                            | Adjuvant                                                        |
| 15          | Dabrafenib mesylate   | TAFINLAR   | 20180504                    | TAFINLAR is indicated, in combination with trametinib, for: the treatment of patients with locally advanced or metastatic anaplastic thyroid cancer (ATC) with BRAF V600E mutation and with no satisfactory locoregional                                                                                                                                                                                                                                                                                                                                         | Any line                                                        |

| Drug number | Generic name          | Brand name | Date of indication approval | New indication approved                                                                                                                                                                                                                                                                                                                                                                                                                                                                                                              | Line of therapy: adjuvant, first line, second line+, any line** |
|-------------|-----------------------|------------|-----------------------------|--------------------------------------------------------------------------------------------------------------------------------------------------------------------------------------------------------------------------------------------------------------------------------------------------------------------------------------------------------------------------------------------------------------------------------------------------------------------------------------------------------------------------------------|-----------------------------------------------------------------|
|             |                       |            |                             | treatment options.<br>Limitations of Use: TAFINLAR is not indicated for treatment of patients with wild-type BRAF melanoma, wild-type BRAF NSCLC, or wild-type BRAF ATC.                                                                                                                                                                                                                                                                                                                                                             |                                                                 |
| 16          | Enasidenib mesylate   | IDHIFA     | 20170801                    | IDHIFA is an isocitrate dehydrogenase-2 inhibitor indicated for the treatment of adult patients with relapsed or refractory acute myeloid leukemia (AML) with an isocitrate dehydrogenase-2 (IDH2) mutation as detected by an FDA approved test.                                                                                                                                                                                                                                                                                     | Second line+                                                    |
| 17          | Encorafenib           | BRAFTOVI   | 20180627                    | BRAFTOVI is a kinase inhibitor indicated, in combination with binimetinib, for the treatment of patients with unresectable or metastatic melanoma with a BRAF V600E or V600K mutation, as detected by an FDA-approved test.<br>Limitations of Use: BRAFTOVI is not indicated for treatment of patients with wild-type BRAF melanoma.                                                                                                                                                                                                 | First line                                                      |
| 18          | Enzalutamide          | XTANDI     | 20120831                    | XTANDI is an androgen receptor inhibitor indicated for the treatment of patients with metastatic castration-resistant prostate cancer who have previously received docetaxel.                                                                                                                                                                                                                                                                                                                                                        | Second line+                                                    |
| 19          | Gilteritinib fumarate | XOSPATA    | 20181128                    | XOSPATA is a kinase inhibitor indicated for the treatment of adult patients who have relapsed or refractory acute myeloid leukemia (AML) with a FLT3 mutation as detected by an FDA-approved test.                                                                                                                                                                                                                                                                                                                                   | Second line+                                                    |
| 20          | Idelalisib            | ZYDELIG    | 20140723                    | Zydelig is a kinase inhibitor indicated for the treatment of patients with: relapsed chronic lymphocytic leukemia (CLL), in combination with rituximab, in patients for whom rituximab alone would be considered appropriate therapy due to other co-morbidities.                                                                                                                                                                                                                                                                    | Second line+                                                    |
| 20          | Idelalisib            | ZYDELIG    | 20140723                    | Relapsed follicular B-cell non-Hodgkin lymphoma (FL) in patients who have received at least two prior systemic therapies.<br>Accelerated approval was granted for FL and SLL based on overall response rate. Improvement in patient survival or disease related symptoms has not been established. Continued approval for these indications may be contingent upon verification of clinical benefit in confirmatory trials.                                                                                                          | Second line+                                                    |
| 20          | Idelalisib            | ZYDELIG    | 20140723                    | Relapsed small lymphocytic lymphoma (SLL) in patients who have received at least two prior systemic therapies.<br>Accelerated approval was granted for FL and SLL based on overall response rate. Improvement in patient survival or disease related symptoms has not been established. Continued approval for these indications may be contingent upon verification of clinical benefit in confirmatory trials.                                                                                                                     | Second line+                                                    |
| 21          | Ivosidenib            | TIBSOVO    | 20180720                    | TIBSOVO is an isocitrate dehydrogenase-1 (IDH1) inhibitor indicated for the treatment of adult patients with relapsed or refractory acute myeloid leukemia (AML) with a susceptible IDH1 mutation as detected by an FDA-approved test.                                                                                                                                                                                                                                                                                               | Second line+                                                    |
| 22          | Ixazomib citrate      | NINLARO    | 20151120                    | NINLARO is a proteasome inhibitor indicated in combination with lenalidomide and dexamethasone for the treatment of patients with multiple myeloma who have received at least one prior therapy.                                                                                                                                                                                                                                                                                                                                     | Second line+                                                    |
| 23          | Larotrectinib         | VITRAKVI   | 20181126                    | VITRAKVI is a kinase inhibitor indicated for the treatment of adult and pediatric patients with solid tumors that: have a neurotrophic receptor tyrosine kinase (NTRK) gene fusion without a known acquired resistance mutation, are metastatic or where surgical resection is likely to result in severe morbidity, and have no satisfactory alternative treatments or that have progressed following treatment.<br>This indication is approved under accelerated approval based on overall response rate and duration of response. | Second line+                                                    |

| Drug number | Generic name        | Brand name | Date of indication approval | New indication approved                                                                                                                                                                                                                                                                                                                                                                                                                                                                                                                                                                                                                                                           | Line of therapy: adjuvant, first line, second line+, any line** |
|-------------|---------------------|------------|-----------------------------|-----------------------------------------------------------------------------------------------------------------------------------------------------------------------------------------------------------------------------------------------------------------------------------------------------------------------------------------------------------------------------------------------------------------------------------------------------------------------------------------------------------------------------------------------------------------------------------------------------------------------------------------------------------------------------------|-----------------------------------------------------------------|
|             |                     |            |                             | Continued approval for this indication may be contingent upon verification and description of clinical benefit in confirmatory trials.                                                                                                                                                                                                                                                                                                                                                                                                                                                                                                                                            |                                                                 |
| 24          | Lenvatinib mesylate | LENVIMA    | 20150213                    | LENVIMA is a kinase inhibitor indicated for the treatment of patients with locally recurrent or metastatic, progressive, radioactive iodine-refractory differentiated thyroid cancer.                                                                                                                                                                                                                                                                                                                                                                                                                                                                                             | Second line+                                                    |
| 24          | Lenvatinib mesylate | LENVIMA    | 20160513                    | Renal Cell Cancer (RCC): in combination with everolimus, for patients with advanced RCC following one prior anti-angiogenic therapy.                                                                                                                                                                                                                                                                                                                                                                                                                                                                                                                                              | Second line+                                                    |
| 24          | Lenvatinib mesylate | LENVIMA    | 20180815                    | For the first-line treatment of patients with unresectable hepatocellular carcinoma (HCC).                                                                                                                                                                                                                                                                                                                                                                                                                                                                                                                                                                                        | First line                                                      |
| 25          | Lorlatinib          | LORBRENA   | 20181102                    | LORBRENA is a kinase inhibitor indicated for the treatment of patients with anaplastic lymphoma kinase (ALK)-positive metastatic non-small cell lung cancer (NSCLC) whose disease has progressed on crizotinib and at least one other ALK inhibitor for metastatic disease; or alectinib as the first ALK inhibitor therapy for metastatic disease; or ceritinib as the first ALK inhibitor therapy for metastatic disease. This indication is approved under accelerated approval based on tumor response rate and duration of response. Continued approval for this indication may be contingent upon verification and description of clinical benefit in a confirmatory trial. | Second line+                                                    |
| 26          | Midostaurin         | RYDAPT     | 20170428                    | RYDAPT is a kinase inhibitor indicated for the treatment of adult patients with: newly diagnosed acute myeloid leukemia (AML) that is FLT3 mutation positive as detected by an FDA-approved test, in combination with standard cytarabine and daunorubicin induction and cytarabine consolidation. Limitations of Use: RYDAPT is not indicated as a single-agent induction therapy for the treatment of patients with AML.                                                                                                                                                                                                                                                        | First line                                                      |
| 26          | Midostaurin         | RYDAPT     | 20170428                    | Aggressive systemic mastocytosis (ASM), systemic mastocytosis with associated hematological neoplasm (SM-AHN), or mast cell leukemia (MCL).                                                                                                                                                                                                                                                                                                                                                                                                                                                                                                                                       | First line                                                      |
| 27          | Neratinib maleate   | NERLYNX    | 20170717                    | NERLYNX is a kinase inhibitor indicated for the extended adjuvant treatment of adult patients with early stage HER2-overexpressed/amplified breast cancer, to follow adjuvant trastuzumab-based therapy.                                                                                                                                                                                                                                                                                                                                                                                                                                                                          | Adjuvant                                                        |
| 28          | Niraparib tosylate  | ZEJULA     | 20170327                    | ZEJULA is a poly (ADP-ribose) polymerase (PARP) inhibitor indicated for the maintenance treatment of adult patients with recurrent epithelial ovarian, fallopian tube, or primary peritoneal cancer who are in a complete or partial response to platinum-based chemotherapy.                                                                                                                                                                                                                                                                                                                                                                                                     | Second line+                                                    |
| 29          | Olaparib            | LYNPARZA   | 20141219                    | LYNPARZA is a poly (ADP-ribose) polymerase (PARP) inhibitor indicated as monotherapy in patients with deleterious or suspected deleterious germline BRCA mutated (as detected by an FDA-approved test) advanced ovarian cancer who have been treated with three or more prior lines of chemotherapy. The indication is approved under accelerated approval based on objective response rate and duration of response. Continued approval for this indication may be contingent upon verification and description of clinical benefit in confirmatory trials.                                                                                                                      | Second line+                                                    |
| 29          | Olaparib            | LYNPARZA   | 20170817                    | For the maintenance treatment of adult patients with recurrent epithelial ovarian, fallopian tube or primary peritoneal cancer, who are in a complete or partial response to platinum-based chemotherapy.                                                                                                                                                                                                                                                                                                                                                                                                                                                                         | Second line+                                                    |

| Drug number | Generic name            | Brand name | Date of indication approval | New indication approved                                                                                                                                                                                                                                                                                                                                                                                                                                                                                                                                     | Line of therapy: adjuvant, first line, second line+, any line** |
|-------------|-------------------------|------------|-----------------------------|-------------------------------------------------------------------------------------------------------------------------------------------------------------------------------------------------------------------------------------------------------------------------------------------------------------------------------------------------------------------------------------------------------------------------------------------------------------------------------------------------------------------------------------------------------------|-----------------------------------------------------------------|
| 29          | Olaparib                | LYNPARZA   | 20180112                    | In patients with deleterious or suspected deleterious gBRCAm, human epidermal growth factor receptor 2 (HER2)-negative metastatic breast cancer who have previously been treated with chemotherapy in the neoadjuvant, adjuvant or metastatic setting. Patients with hormone receptor (HR)-positive breast cancer should have been treated with a prior endocrine therapy or be considered inappropriate for endocrine treatment. Select patients for therapy based on an FDA-approved companion diagnostic for Lynparza.                                   | Second line+                                                    |
| 29          | Olaparib                | LYNPARZA   | 20181219                    | For the maintenance treatment of adult patients with recurrent epithelial ovarian, fallopian tube or primary peritoneal cancer, who are in a complete or partial response to platinum-based chemotherapy.                                                                                                                                                                                                                                                                                                                                                   | Second line+                                                    |
| 30          | Osimertinib mesylate    | TAGRISSE   | 20151113                    | TAGRISSE is a kinase inhibitor indicated for the treatment of patients with metastatic epidermal growth factor receptor (EGFR) T790M mutation-positive non-small cell lung cancer (NSCLC), as detected by an FDA approved test, who have progressed on or after EGFR TKI therapy. This indication is approved under accelerated approval based on tumor response rate and duration of response. Continued approval for this indication may be contingent upon verification and description of clinical benefit in confirmatory trials.                      | Second line+                                                    |
| 30          | Osimertinib mesylate    | TAGRISSE   | 20180418                    | The first-line treatment of patients with metastatic NSCLC whose tumors have epidermal growth factor receptor (EGFR) exon 19 deletions or exon 21 L858R mutations, as detected by an FDA-approved test.                                                                                                                                                                                                                                                                                                                                                     | First line                                                      |
| 31          | Palbociclib             | IBRANCE    | 20150203                    | IBRANCE is a kinase inhibitor indicated in combination with letrozole for the treatment of postmenopausal women with estrogen receptor (ER)-positive, human epidermal growth factor receptor 2 (HER2)-negative advanced breast cancer as initial endocrine-based therapy for their metastatic disease. This indication is approved under accelerated approval based on progression-free survival (PFS). Continued approval for this indication may be contingent upon verification and description of clinical benefit in a confirmatory trial.             | First line                                                      |
| 32          | Panobinostat lactate    | FARYDAK    | 20150223                    | FARYDAK, a histone deacetylase inhibitor, in combination with bortezomib and dexamethasone, is indicated for the treatment of patients with multiple myeloma who have received at least 2 prior regimens, including bortezomib and an immunomodulatory agent. This indication is approved under accelerated approval based on progression free survival. Continued approval for this indication may be contingent upon verification and description of clinical benefit in confirmatory trials.                                                             | Second line+                                                    |
| 33          | Pomalidomide            | POMALYST   | 20130208                    | POMALYST is a thalidomide analogue indicated for patients with multiple myeloma who have received at least two prior therapies including lenalidomide and bortezomib and have demonstrated disease progression on or within 60 days of completion of the last therapy. Approval is based on response rate. Clinical benefit, such as improvement in survival or symptoms, has not been verified.                                                                                                                                                            | Second line+                                                    |
| 34          | Ponatinib hydrochloride | ICLUSIG    | 20121214                    | ICLUSIG is a kinase inhibitor indicated for the treatment of adult patients with chronic phase, accelerated phase, or blast phase chronic myeloid leukemia (CML) that is resistant or intolerant to prior tyrosine kinase inhibitor therapy or Philadelphia chromosome positive acute lymphoblastic leukemia (Ph+ALL) that is resistant or intolerant to prior tyrosine kinase inhibitor therapy. This indication is based upon response rate. There are no trials verifying an improvement in disease-related symptoms or increased survival with Iclusig. | Second line+                                                    |



| Drug number | Generic name                  | Brand name | Date of indication approval | New indication approved                                                                                                                                                                                                                                                                                                                                                                                                                                                                                                                                                                                                 | Line of therapy: adjuvant, first line, second line+, any line** |
|-------------|-------------------------------|------------|-----------------------------|-------------------------------------------------------------------------------------------------------------------------------------------------------------------------------------------------------------------------------------------------------------------------------------------------------------------------------------------------------------------------------------------------------------------------------------------------------------------------------------------------------------------------------------------------------------------------------------------------------------------------|-----------------------------------------------------------------|
| 35          | Regorafenib                   | STIVARGA   | 20120927                    | STIVARGA is a kinase inhibitor indicated for the treatment of patients with metastatic colorectal cancer (CRC) who have been previously treated with fluoropyrimidine-, oxaliplatin- and irinotecan-based chemotherapy, an antiVEGF therapy, and, if KRAS wild type, an anti-EGFR therapy.                                                                                                                                                                                                                                                                                                                              | Second line+                                                    |
| 35          | Regorafenib                   | STIVARGA   | 20130225                    | Locally advanced, unresectable or metastatic gastrointestinal stromal tumor (GIST) who have been previously treated with imatinib mesylate and sunitinib malate.                                                                                                                                                                                                                                                                                                                                                                                                                                                        | Second line+                                                    |
| 35          | Regorafenib                   | STIVARGA   | 20170427                    | Hepatocellular carcinoma (HCC) who have been previously treated with sorafenib.                                                                                                                                                                                                                                                                                                                                                                                                                                                                                                                                         | Second line+                                                    |
| 36          | Ribociclib succinate          | KISQALI    | 20170313                    | KISQALI is a kinase inhibitor indicated in combination with an aromatase inhibitor as initial endocrine-based therapy for the treatment of postmenopausal women with hormone receptor (HR)-positive, human epidermal growth factor receptor 2 (HER2)-negative advanced or metastatic breast cancer.                                                                                                                                                                                                                                                                                                                     | First line                                                      |
| 37          | Rucaparib camsylate           | RUBRACA    | 20161219                    | RUBRACA is a poly (ADP-ribose) polymerase (PARP) inhibitor indicated as monotherapy for the treatment of patients with deleterious BRCA mutation (germline and/or somatic) associated advanced ovarian cancer who have been treated with two or more chemotherapies. Select patients for therapy based on an FDA-approved companion diagnostic for RUBRACA.<br>This indication is approved under accelerated approval based on objective response rate and duration of response. Continued approval for this indication may be contingent upon verification and description of clinical benefit in confirmatory trials. | Second line+                                                    |
| 37          | Rucaparib camsylate           | RUBRACA    | 20180406                    | For the maintenance treatment of adult patients with recurrent epithelial ovarian, fallopian tube, or primary peritoneal cancer who are in a complete or partial response to platinum-based chemotherapy.                                                                                                                                                                                                                                                                                                                                                                                                               | Second line+                                                    |
| 38          | Ruxolitinib                   | JAKAFI     | 20111116                    | JAKAFI is a kinase inhibitor indicated for treatment of patients with intermediate or high-risk myelofibrosis, including primary myelofibrosis, post-polycythemia vera myelofibrosis and post-essential thrombocythemia myelofibrosis.                                                                                                                                                                                                                                                                                                                                                                                  | Second line+                                                    |
| 38          | Ruxolitinib                   | JAKAFI     | 20141204                    | Polycythemia vera who have had an inadequate response to or are intolerant of hydroxyurea.                                                                                                                                                                                                                                                                                                                                                                                                                                                                                                                              | Second line+                                                    |
| 39          | Sonidegib phosphate           | ODOMZO     | 20150724                    | ODOMZO is a hedgehog pathway inhibitor indicated for the treatment of adult patients with locally advanced basal cell carcinoma (BCC) that has recurred following surgery or radiation therapy, or those who are not candidates for surgery or radiation therapy.                                                                                                                                                                                                                                                                                                                                                       | First line                                                      |
| 40          | Talazoparib tosylate          | TALZENNA   | 20181016                    | TALZENNA is a poly (ADP-ribose) polymerase (PARP) inhibitor indicated for the treatment of adult patients with deleterious or suspected deleterious germline BRCA-mutated (gBRCAm) HER2-negative locally advanced or metastatic breast cancer. Select patients for therapy based on an FDA-approved companion diagnostic for TALZENNA.                                                                                                                                                                                                                                                                                  | Second line+                                                    |
| 41          | Trametinib dimethyl sulfoxide | MEKINIST   | 20130529                    | MEKINIST is a kinase inhibitor indicated as a single agent for the treatment of patients with unresectable or metastatic melanoma with BRAF V600E or V600K mutations as detected by an FDA-approved test.                                                                                                                                                                                                                                                                                                                                                                                                               | Any line                                                        |
| 41          | Trametinib dimethyl sulfoxide | MEKINIST   | 20170622                    | MEKINIST is indicated, in combination with dabrafenib, for the treatment of patients with: metastatic non-small cell lung cancer (NSCLC) with BRAF V600E mutation as detected by an FDA-approved test.                                                                                                                                                                                                                                                                                                                                                                                                                  | Any line                                                        |

| Drug number | Generic name                  | Brand name | Date of indication approval | New indication approved                                                                                                                                                                                                                                                                                                                                                                                                                                                                 | Line of therapy: adjuvant, first line, second line+, any line** |
|-------------|-------------------------------|------------|-----------------------------|-----------------------------------------------------------------------------------------------------------------------------------------------------------------------------------------------------------------------------------------------------------------------------------------------------------------------------------------------------------------------------------------------------------------------------------------------------------------------------------------|-----------------------------------------------------------------|
| 41          | Trametinib dimethyl sulfoxide | MEKINIST   | 20180430                    | MEKINIST is indicated, in combination with dabrafenib, for: the adjuvant treatment of patients with melanoma with BRAF V600E or V600K mutations, as detected by an FDA-approved test, and involvement of lymph node(s), following complete resection.                                                                                                                                                                                                                                   | Adjuvant                                                        |
| 41          | Trametinib dimethyl sulfoxide | MEKINIST   | 20180504                    | MEKINIST is indicated, in combination with dabrafenib, for: the treatment of patients with locally advanced or metastatic anaplastic thyroid cancer (ATC) with BRAF V600E mutation and with no satisfactory locoregional treatment options.                                                                                                                                                                                                                                             | Any line                                                        |
| 42          | Vandetanib                    | CAPRELSA   | 20110406                    | CAPRELSA is a kinase inhibitor indicated for the treatment of symptomatic or progressive medullary thyroid cancer in patients with unresectable locally advanced or metastatic disease. Use of vandetanib in patients with indolent, asymptomatic or slowly progressing disease should be carefully considered because of the treatment related risks of vandetanib.                                                                                                                    | First line                                                      |
| 43          | Venetoclax                    | VENCLEXTA  | 20160411                    | VENCLEXTA is a BCL-2 inhibitor indicated for the treatment of patients with chronic lymphocytic leukemia (CLL) with 17p deletion, as detected by an FDA approved test, who have received at least one prior therapy. This indication is approved under accelerated approval based on overall response rate. Continued approval for this indication may be contingent upon verification and description of clinical benefit in a confirmatory trial.                                     | Second line+                                                    |
| 43          | Venetoclax                    | VENCLEXTA  | 20181121                    | In combination with azacitidine or decitabine or low-dose cytarabine for the treatment of newly-diagnosed acute myeloid leukemia (AML) in adults who are age 75 years or older, or who have comorbidities that preclude use of intensive induction chemotherapy. This indication is approved under accelerated approval based on response rates. Continued approval for this indication may be contingent upon verification and description of clinical benefit in confirmatory trials. | First line                                                      |
| 44          | Vismodegib                    | ERIVEDGE   | 20120130                    | ERIVEDGE capsule is a hedgehog pathway inhibitor indicated for the treatment of adults with metastatic basal cell carcinoma, or with locally advanced basal cell carcinoma that has recurred following surgery or who are not candidates for surgery, and who are not candidates for radiation.                                                                                                                                                                                         | First line                                                      |

Notes: \*Oral targeted cancer drugs with only cancer indications; \*\* First line therapy: "The first treatment given for a disease. It is often part of a standard set of treatments, such as surgery followed by chemotherapy and radiation. When used by itself, first-line therapy is the one accepted as the best treatment. If it doesn't cure the disease or it causes severe side effects, other treatment may be added or used instead. Also called induction therapy, primary therapy, and primary treatment." (<https://www.cancer.gov/publications/dictionaries/cancer-terms/def/first-line-therapy>); adjuvant therapy: "Additional cancer treatment given after the primary treatment to lower the risk that the cancer will come back. Adjuvant therapy may include chemotherapy, radiation therapy, hormone therapy, targeted therapy, or biological therapy." (<https://www.cancer.gov/publications/dictionaries/cancer-terms/def/adjuvant-therapy>)

**eTable 3.** Trials of drugs with information on OS benefit reported in FDA-approved labels, 2011-2018.

**eTable 3a.** Trials of drugs with documented OS benefit in FDA-approved labels, 2011-2018.

| Generic name          | Date of trial results documented in the label | Trial at approval | Enrolled patients                                                                                                                                                                                                              | Treatment arm            |                              |                              | Control arm             |                              |                              | Hazard ratio (95% CI) | p value     |
|-----------------------|-----------------------------------------------|-------------------|--------------------------------------------------------------------------------------------------------------------------------------------------------------------------------------------------------------------------------|--------------------------|------------------------------|------------------------------|-------------------------|------------------------------|------------------------------|-----------------------|-------------|
|                       |                                               |                   |                                                                                                                                                                                                                                | Treatment                | Number of deaths/Sample size | Median OS in months (95% CI) | Control                 | Number of deaths/Sample size | Median OS in months (95% CI) |                       |             |
| Abiraterone acetate   | 20110428                                      | yes               | Patients with metastatic castration-resistant prostate cancer (CRPC) who had received prior docetaxel chemotherapy                                                                                                             | Abiraterone              | 501/797                      | 15.8 (14.8, 17.0)            | Placebo                 | 274/398                      | 11.2 (10.4, 13.1)            | 0.74 (0.64, 0.86)     | <0.0001     |
|                       | 20150320 (update)                             | no                | Patients with metastatic castration-resistant prostate cancer (CRPC) who had not received prior cytotoxic chemotherapy                                                                                                         | Abiraterone              | 354/546                      | 34.7 (32.7, 36.8)            | Placebo                 | 387/542                      | 30.3 (28.7, 33.3)            | 0.81 (0.70, 0.93)     | 0.003       |
|                       | 20180207                                      | no                | Patients with metastatic high-risk castration-resistant prostate cancer (CRPC).                                                                                                                                                | Abiraterone+ Prednisone  | 169/597                      | NE                           | Placebos                | 237/602                      | 34.7 (33.1, NE)              | 0.621 (0.509, 0.756)  | < 0.0001 ** |
| Afatinib dimaleate    | 20160415                                      | yes               | Patients were required to have histologically documented, metastatic squamous NSCLC and have experienced disease progression following an adequate course ( $\geq 4$ cycles) of a platinum-based doublet chemotherapy regimen. | Afatinib                 | 307/398                      | 7.9 (7.2, 8.7)               | Erlotinib               | 325/397                      | 6.8 (5.9, 7.8)               | 0.81 (0.69, 0.95)     | 0.008       |
| Cabozantinib s-malate | 20160425                                      | yes               | Patients with advanced renal cell carcinoma (RCC) who had received at least 1 prior anti-angiogenic therapy                                                                                                                    | Cabozantinib (Cabometyx) | NM/330                       | 21.4 (18.7, NE)              | Everolimus              | NM/328                       | 16.5 (14.7, 18.8)            | 0.66 (0.53, 0.83)     | 0.000       |
| Cobimetinib           | 20180126 (update)                             | yes               | Patients with previously untreated, BRAF V600 mutation-positive, unresectable or metastatic, melanoma                                                                                                                          | Cobimetinib+Vemurafenib  | 114/247                      | 22.3 (20.3, NE)              | Placebo+Vemurafenib     | 141/248                      | 17.4 (15.0, 19.8)            | 0.69 (0.54,0.88)      | 0.0032      |
| Dabrafenib mesylate   | 20151120                                      | no                | Patients with unresectable (Stage IIIc) or metastatic (Stage IV) BRAF V600E or V600K                                                                                                                                           | Dabrafenib+ Trametinib   | 99/211                       | 25.1 (19.2, NR)              | Dabrafenib plus placebo | 123/212                      | 18.7 (15.2, 23.1)            | 0.71 (0.55, 0.92)     | 0.010       |

| Generic name | Date of trial results documented in the label | Trial at approval | Enrolled patients                                                                                                                                                                                                                          | Treatment arm                        |                              |                              | Control arm                    |                              |                              | Hazard ratio (95% CI) | p value    |
|--------------|-----------------------------------------------|-------------------|--------------------------------------------------------------------------------------------------------------------------------------------------------------------------------------------------------------------------------------------|--------------------------------------|------------------------------|------------------------------|--------------------------------|------------------------------|------------------------------|-----------------------|------------|
|              |                                               |                   |                                                                                                                                                                                                                                            | Treatment                            | Number of deaths/Sample size | Median OS in months (95% CI) | Control                        | Number of deaths/Sample size | Median OS in months (95% CI) |                       |            |
|              |                                               |                   | mutation-positive cutaneous melanoma                                                                                                                                                                                                       |                                      |                              |                              |                                |                              |                              |                       |            |
|              | 20151120                                      | no                | Patients with unresectable (Stage IIIC) or metastatic (Stage IV) BRAF V600E or V600K mutation-positive cutaneous melanoma                                                                                                                  | Dabrafenib+ Trametinib               | 100/352                      | NR (18.3, NR)                | Vemurafenib                    | 122/352                      | 17.2 (16.4, NR)              | 0.69 (0.53, 0.89)     | 0.005***   |
| Enzalutamide | 20120831                                      | yes               | Patients with metastatic castration-resistant prostate cancer (CRPC) who had received prior docetaxel-based chemotherapy                                                                                                                   | Enzalutamide                         | 308/800                      | 18.4 (17.3, NR)              | Placebo                        | 212/339                      | 13.6 (11.3, 15.8)            | 0.63 (0.53, 0.75)     | < 0.0001** |
|              | 20150805 (update)                             | no                | Patients with visceral metastases, patients with a history of mild to moderate heart failure (NYHA class I or II), and patients taking medications associated with lowering the seizure threshold.                                         | Enzalutamide                         | 368/872                      | 35.3 (32.2, NR)              | Placebo                        | 416/845                      | 31.3 (28.8, 34.2)            | 0.77 (0.67, 0.88)     | <0.0001    |
| Midostaurin  | 20170428                                      | yes               | patients with newly-diagnosed FLT3-mutated acute myeloid leukemia (AML)                                                                                                                                                                    | Midostaurin+ Standard chemotherapy   | NM/360                       | NE                           | Placebo+ standard chemotherapy | NM/357                       | NE                           | 0.77 (0.63, 0.95)     | 0.016      |
| Olaparib     | 20170817                                      | yes               | Patients with platinum sensitive ovarian cancer who had received 2 or more previous platinum                                                                                                                                               | Olaparib                             | 98/136                       | 29.8                         | Placebo                        | 112/129                      | 27.8                         | 0.73 (0.55, 0.95)     | <0.0001    |
| Pomalidomide | 20150423                                      | no                | Adult patients with relapsed and refractory multiple myeloma, who had received at least two prior treatment regimens, including lenalidomide and bortezomib, and demonstrated disease progression on or within 60 days of the last therapy | Pomalidomide+ Low-dose dexamethasone | 147/302                      | 12.4 (10.4, 15.3)            | High-dose dexamethasone        | 86/153                       | 8.0 (6.9, 9.0)               | 0.70 (0.54, 0.92)     | 0.009      |
| Regorafenib  | 20120927                                      | yes               | Patients with previously-treated metastatic colorectal cancer.                                                                                                                                                                             | Regorafenib+                         | 275/505                      | 6.4 (5.8, 7.3)               | Placebo+ Best                  | 157/255                      | 5.0 (4.4, 5.8)               | 0.77 (0.64, 0.94)     | 0.010      |

| Generic name                  | Date of trial results documented in the label | Trial at approval | Enrolled patients                                                                                                                                                          | Treatment arm          |                              |                              | Control arm             |                              |                              | Hazard ratio (95% CI) | p value |
|-------------------------------|-----------------------------------------------|-------------------|----------------------------------------------------------------------------------------------------------------------------------------------------------------------------|------------------------|------------------------------|------------------------------|-------------------------|------------------------------|------------------------------|-----------------------|---------|
|                               |                                               |                   |                                                                                                                                                                            | Treatment              | Number of deaths/Sample size | Median OS in months (95% CI) | Control                 | Number of deaths/Sample size | Median OS in months (95% CI) |                       |         |
|                               |                                               |                   |                                                                                                                                                                            | Best supportive care   |                              |                              | supportive care         |                              |                              |                       |         |
|                               | 20170427                                      | yes               | Adult patients with Child-Pugh A and Barcelona Clinic Liver Cancer Stage Category B or C hepatocellular carcinoma, with documented disease progression following sorafenib | Regorafenib            | 233/379                      | 10.6 (9.1, 12.1)             | Placebo                 | 140/194                      | 7.8 (6.3, 8.8)               | 0.63 (0.50, 0.79)     | <0.0001 |
| Trametinib dimethyl sulfoxide | 20151120                                      | no                | Patients with unresectable (Stage IIIc) or metastatic (Stage IV) BRAF V600E or V600K mutation-positive cutaneous melanoma                                                  | Trametinib+ Dabrafenib | 99/211                       | 25.1 (19.2, NR)              | Dabrafenib plus Placebo | 123/212                      | 18.7 (15.2, 23.1)            | 0.71 (0.55, 0.92)     | 0.010   |

Note: \*Oral targeted drugs indicated only for cancers, with confirmed, statistically significant overall survival benefit or inferred overall survival benefit documented in FDA-approved labels by the end of 2018, OS=Overall survival, NE= Not estimable, NR=Not reached, NM=not mentioned; \*\* A statistically significant improvement in overall survival was demonstrated at the pre-specified interim analysis; \*\*\* P-value is comparing with the allocated alpha of 0.021 for the interim analysis based on 77% information.

**eTable 3b.** Trials of drugs without documented OS benefit in FDA-approved labels, 2011-2018.

| Generic name                                                                            | Date of trial results documented in the label | Trial at approval | Enrolled patients                                                                                                                  | Treatment arm |                              |                              | Control arm |                              |                              | Hazard ratio (95% CI) | p value |
|-----------------------------------------------------------------------------------------|-----------------------------------------------|-------------------|------------------------------------------------------------------------------------------------------------------------------------|---------------|------------------------------|------------------------------|-------------|------------------------------|------------------------------|-----------------------|---------|
|                                                                                         |                                               |                   |                                                                                                                                    | Treatment     | Number of deaths/Sample size | Median OS in months (95% CI) | Control     | Number of deaths/Sample size | Median OS in months (95% CI) |                       |         |
| <b>Confirmed or inferred lack of statistically significant overall survival benefit</b> |                                               |                   |                                                                                                                                    |               |                              |                              |             |                              |                              |                       |         |
| Axitinib                                                                                | 20120127                                      | yes               | Patients with advanced RCC whose disease had progressed on or after treatment with 1 prior systemic therapy, including sunitinib-, | Axitinib      | NM/361                       | 20.1 (16.7, 23.4)            | Sorafenib   | NM/362                       | 19.2 (17.5, 22.3)            | 0.97 (0.80, 1.17)     | NS      |

| Generic name          | Date of trial results documented in the label | Trial at approval | Enrolled patients                                                                                                                                   | Treatment arm                               |                              |                              | Control arm                              |                              |                              | Hazard ratio (95% CI) | p value |
|-----------------------|-----------------------------------------------|-------------------|-----------------------------------------------------------------------------------------------------------------------------------------------------|---------------------------------------------|------------------------------|------------------------------|------------------------------------------|------------------------------|------------------------------|-----------------------|---------|
|                       |                                               |                   |                                                                                                                                                     | Treatment                                   | Number of deaths/Sample size | Median OS in months (95% CI) | Control                                  | Number of deaths/Sample size | Median OS in months (95% CI) |                       |         |
|                       |                                               |                   | bevacizumab-, temsirolimus-, or cytokine-containing regimens                                                                                        |                                             |                              |                              |                                          |                              |                              |                       |         |
| Cabozantinib s-malate | 20160520                                      | no                | Patients with metastatic medullary thyroid carcinoma (MTC)                                                                                          | Cabozantinib (COMETRIQ)                     | NM/219                       | 26.6                         | Placebo                                  | NM/111                       | 21.1                         | 0.85 (0.64, 1.12)     | 0.2409  |
| Ceritinib             | 20170526                                      | no                | Patients with ALK-positive NSCLC who had not received prior systemic therapy for metastatic disease                                                 | Ceritinib                                   | NM/189                       | NM                           | Chemotherapy                             | NM/187                       | NM                           | NM                    | NM**    |
| Crizotinib            | 20170428                                      | no                | Patients with ALK-positive metastatic NSCLC, previously treated with 1 platinum-based chemotherapy regimen                                          | Crizotinib                                  | 116/173                      | 21.7 (18.9,30.5)             | Chemotherapy                             | 126/174                      | 21.9 (16.8,26.0)             | 0.85 (0.66, 1.10)     | 0.2290  |
|                       | 20181130                                      | no                | Patients with ALK-positive NSCLC as identified by the FDA-approved assay, Vysis ALK Break-Apart fluorescence in situ hybridization (FISH) Probe Kit | Crizotinib                                  | 71 /172                      | NR (45.8, NR)                | Chemotherapy                             | 81/171                       | 47.5 (32.2, NR)              | 0.76 (0.55, 1.05)     | 0.0980  |
| Ixazomib              | 20151120                                      | yes               | Patients with relapsed and/or refractory multiple myeloma who had received at least one prior line of therapy                                       | Ixazomib + Lenalidomide and Dexamethasone   | 81/360                       | NM                           | Placebo + Lenalidomide and Dexamethasone | 90/362                       | NM                           | NM                    | NM**    |
| Lenvatinib            | 20150213                                      | yes               | Patients with radioactive iodine-refractory differentiated thyroid cancer                                                                           | Lenvatinib                                  | 71/261                       | NE (22.1, NE)                | Placebo                                  | 47/131                       | NE (20.3, NE)                | 0.73 (0.50, 1.07)     | 0.1000  |
|                       | 20160513                                      | no                | Patients with advanced or metastatic renal cell carcinoma who have previously received anti-angiogenic therapy                                      | Lenvatinib 18 mg + Everolimus 5 mg          | 32/51                        | 25.5 (16.4, 32.1)            | Everolimus 10 mg                         | 37/50                        | 15.4 (11.8, 20.6)            | 0.67 (0.42, 1.08)     | NM      |
| Panobinostat          | 20150223                                      | yes               | Patients with relapsed multiple myeloma who had received 1 to 3 prior lines of therapy                                                              | Panobinostat + bortezomib and dexamethasone | NM/94                        | NM                           | Placebo + bortezomib and dexamethasone   | NM/99                        | NM                           | NM                    | NM**    |

| Generic name                                                                                                                                                            | Date of trial results documented in the label | Trial at approval | Enrolled patients                                                                                    | Treatment arm |                              |                              | Control arm            |                              |                              | Hazard ratio (95% CI) | p value |
|-------------------------------------------------------------------------------------------------------------------------------------------------------------------------|-----------------------------------------------|-------------------|------------------------------------------------------------------------------------------------------|---------------|------------------------------|------------------------------|------------------------|------------------------------|------------------------------|-----------------------|---------|
|                                                                                                                                                                         |                                               |                   |                                                                                                      | Treatment     | Number of deaths/Sample size | Median OS in months (95% CI) | Control                | Number of deaths/Sample size | Median OS in months (95% CI) |                       |         |
| Ruxolitinib                                                                                                                                                             | 20140725                                      | no                | Patients with MF (either primary MF, post-polycythemia vera MF or post-essential thrombocythemia-MF) | Ruxolitinib   | NM/155                       | NM                           | Placebo                | NM/154                       | NM                           | NM                    | NM***   |
|                                                                                                                                                                         | 20140725                                      | no                | Patients with MF (either primary MF, post-polycythemia vera MF or post-essential thrombocythemia-MF) | Ruxolitinib   | NM/146                       | NM                           | Best available therapy | NM/73                        | NM                           | NM                    | NM***   |
| Vandetanib                                                                                                                                                              | 20181012                                      | no                | Patients with unresectable locally advanced or metastatic medullary thyroid cancer                   | Vandetanib    | 116/231                      | 81.6 (64.6, 98.5)            | Placebo                | 52/100                       | 80.4 (52.5, NE)              | 0.99 (0.72, 1.38)     | 0.9750  |
| <b>OS data obtained from a trial with non-inferiority design</b>                                                                                                        |                                               |                   |                                                                                                      |               |                              |                              |                        |                              |                              |                       |         |
| Lenvatinib                                                                                                                                                              | 20180815                                      | no                | Patients with previously untreated unresectable hepatocellular carcinoma (HCC)                       | Lenvatinib    | 351/478                      | 13.6 (12.1, 14.9)            | Sorafenib              | 350/476                      | 12.3 (10.4, 13.9)            | 0.92 (0.79, 1.06)     | NM      |
| <b>OS not mentioned, or OS results not reported or not reported in a way that can support inference</b>                                                                 |                                               |                   |                                                                                                      |               |                              |                              |                        |                              |                              |                       |         |
| <b>a) The label for the drug-indication pair did not mention (overall) survival (not in text, no data in figures or tables) except to say that it was not measured:</b> |                                               |                   |                                                                                                      |               |                              |                              |                        |                              |                              |                       |         |
| With RCT- bosutinib, encorafenib, idelalisib                                                                                                                            |                                               |                   |                                                                                                      |               |                              |                              |                        |                              |                              |                       |         |
| Without RCT- acalabrutinib, brigatinib, enasidenib, gilteritinib, ivosidenib, larotrectinib, lorlatinib, ponatinib, sonidegib, vismodegib                               |                                               |                   |                                                                                                      |               |                              |                              |                        |                              |                              |                       |         |
| <b>b) The label included overall survival among trial endpoints but results are not reported:</b>                                                                       |                                               |                   |                                                                                                      |               |                              |                              |                        |                              |                              |                       |         |
| Abemaciclib, alectinib, apalutamide, binimetinib, neratinib, niraparib, osimertinib, palbociclib, ribociclib, rucaparib, talazoparib, venetoclax                        |                                               |                   |                                                                                                      |               |                              |                              |                        |                              |                              |                       |         |

Note: \*Oral targeted drugs indicated only for cancers, with statistically non-significant overall survival benefit documented in FDA-approved labels by the end of 2018, OS=Overall survival, NS= Not significant, NR=Not reached, NM=not mentioned; \*\* A statistically non-significant improvement in overall survival was demonstrated at the pre-specified interim analysis; \*\*\* Numerical OS data on the basis of interim analysis suggest statistically significant harm associated with the experimental treatment .

**eTable 4.** Magnitude of OS benefit and spending associated with oral targeted cancer drugs with documented OS benefit, as reported in FDA-approved labels\* in 2018.

| Spending rank | Generic name                  | Spending in 2018 (million USD) | First approval year | OS primary endpoint | Extension of OS (months) |
|---------------|-------------------------------|--------------------------------|---------------------|---------------------|--------------------------|
| 1             | Abiraterone acetate           | 95.8                           | 2011                | yes                 | 4.6                      |
| 2             | Enzalutamide                  | 74.3                           | 2012                | yes                 | 4.6                      |
| 3             | Pomalidomide                  | 69.3                           | 2013                | no                  | 4.4                      |
| 4             | Cabozantinib s-malate         | 38.1                           | 2012                | no                  | 4.9                      |
| 5             | Olaparib                      | 28.2                           | 2014                | no                  | 2.0                      |
| 6             | Trametinib dimethyl sulfoxide | 19.0                           | 2013                | no                  | 6.4                      |
| 7             | Dabrafenib mesylate           | 16.3                           | 2013                | no                  | 6.4                      |
| 8             | Regorafenib                   | 11.7                           | 2012                | yes                 | 2.8                      |
| 9             | Afatinib dimaleate            | 7.8                            | 2013                | no                  | 1.1                      |
| 10            | Midostaurin                   | 6.6                            | 2017                | yes                 | NE                       |
| 11            | Cobimetinib fumarate          | 1.1                            | 2015                | no                  | 4.9                      |

Note: \*Oral targeted cancer drugs with only cancer indications; spending= sum of total gross payment associated with dispensings in 2018; OS=evidence of overall survival benefit by end of 2018; OS primary endpoint= OS was the primary endpoint in label-reported pivotal RCTs by the end of 2018; extension of OS benefit=longest extension of OS benefit against the comparator across trials; NE= Not estimable



**eTable 5.** Spending associated with dispensing events for 44 oral targeted cancer drugs\* in 2018.

| Spending rank | Generic name                  | Spending (million USD) | First approval year | Pivotal RCT | Documented OS benefit | OS primary endpoint | Orphan drug designation | FDA Approval Pathway |                 |                      |                      |
|---------------|-------------------------------|------------------------|---------------------|-------------|-----------------------|---------------------|-------------------------|----------------------|-----------------|----------------------|----------------------|
|               |                               |                        |                     |             |                       |                     |                         | Fast track           | Priority review | Breakthrough therapy | Accelerated approval |
| 1             | Palbociclib                   | 209.0                  | 2015                | yes         | no                    | no                  | no                      | no                   | yes             | yes                  | yes                  |
| 2             | Abiraterone acetate           | 95.8                   | 2011                | yes         | yes                   | yes                 | no                      | no                   | yes             | NA                   | no                   |
| 3             | Ruxolitinib                   | 75.8                   | 2011                | yes         | no                    | no                  | yes                     | no                   | yes             | NA                   | no                   |
| 4             | Enzalutamide                  | 74.3                   | 2012                | yes         | yes                   | yes                 | no                      | yes                  | yes             | no                   | no                   |
| 5             | Pomalidomide                  | 69.3                   | 2013                | yes         | yes                   | no                  | yes                     | yes                  | no              | no                   | yes                  |
| 6             | Osimertinib mesylate          | 61.9                   | 2015                | yes         | no                    | no                  | yes                     | yes                  | yes             | yes                  | yes                  |
| 7             | Cabozantinib s-malate         | 38.1                   | 2012                | yes         | yes                   | no                  | yes                     | yes                  | yes             | no                   | no                   |
| 8             | Olaparib                      | 28.2                   | 2014                | yes         | yes                   | no                  | yes                     | no                   | yes             | no                   | yes                  |
| 9             | Ixazomib citrate              | 24.5                   | 2015                | yes         | no                    | no                  | yes                     | no                   | yes             | no                   | no                   |
| 10            | Alectinib hydrochloride       | 23.8                   | 2015                | yes         | no                    | no                  | yes                     | no                   | yes             | yes                  | yes                  |
| 11            | Neratinib maleate             | 20.2                   | 2017                | yes         | no                    | no                  | no                      | no                   | no              | no                   | no                   |
| 12            | Abemaciclib                   | 19.7                   | 2017                | yes         | no                    | no                  | no                      | yes                  | yes             | yes                  | no                   |
| 13            | Trametinib dimethyl sulfoxide | 19.0                   | 2013                | yes         | yes                   | no                  | yes                     | yes                  | no              | no                   | no                   |
| 14            | Bosutinib monohydrate         | 16.4                   | 2012                | yes         | no                    | no                  | yes                     | no                   | no              | no                   | no                   |
| 15            | Dabrafenib mesylate           | 16.3                   | 2013                | yes         | yes                   | no                  | yes                     | yes                  | no              | no                   | no                   |
| 16            | Lenvatinib mesylate           | 16.1                   | 2015                | yes         | no                    | no                  | yes                     | no                   | yes             | no                   | no                   |
| 17            | Niraparib tosylate            | 14.4                   | 2017                | yes         | no                    | no                  | yes                     | yes                  | yes             | yes                  | no                   |
| 18            | Crizotinib                    | 13.0                   | 2011                | yes         | no                    | no                  | yes                     | yes                  | yes             | NA                   | yes                  |
| 19            | Ponatinib hydrochloride       | 13.0                   | 2012                | no          | no                    | no                  | yes                     | yes                  | yes             | no                   | yes                  |
| 20            | Venetoclax                    | 12.9                   | 2016                | yes         | no                    | no                  | yes                     | no                   | yes             | yes                  | yes                  |
| 21            | Regorafenib                   | 11.7                   | 2012                | yes         | yes                   | yes                 | no                      | yes                  | yes             | no                   | no                   |
| 22            | Rucaparib camsylate           | 8.7                    | 2016                | yes         | no                    | no                  | yes                     | no                   | yes             | yes                  | yes                  |
| 23            | Axitinib                      | 7.8                    | 2012                | yes         | no                    | no                  | no                      | yes                  | no              | NA                   | no                   |
| 24            | Afatinib dimaleate            | 7.8                    | 2013                | yes         | yes                   | no                  | yes                     | yes                  | yes             | no                   | no                   |
| 25            | Ribociclib succinate          | 7.6                    | 2017                | yes         | no                    | no                  | no                      | no                   | yes             | yes                  | no                   |
| 26            | Vismodegib                    | 7.2                    | 2012                | no          | no                    | no                  | no                      | no                   | yes             | NA                   | no                   |
| 27            | Midostaurin                   | 6.6                    | 2017                | yes         | yes                   | yes                 | yes                     | yes                  | yes             | yes                  | no                   |

| Spending rank | Generic name          | Spending (million USD) | First approval year | Pivotal RCT | Documented OS benefit | OS primary endpoint | Orphan drug designation | FDA Approval Pathway |                 |                      |                      |
|---------------|-----------------------|------------------------|---------------------|-------------|-----------------------|---------------------|-------------------------|----------------------|-----------------|----------------------|----------------------|
|               |                       |                        |                     |             |                       |                     |                         | Fast track           | Priority review | Breakthrough therapy | Accelerated approval |
| 28            | Apalutamide           | 5.0                    | 2018                | yes         | no                    | no                  | no                      | yes                  | yes             | no                   | no                   |
| 29            | Acalabrutinib         | 3.5                    | 2017                | no          | no                    | no                  | yes                     | no                   | yes             | yes                  | yes                  |
| 30            | Brigatinib            | 3.5                    | 2017                | no          | no                    | no                  | yes                     | no                   | yes             | yes                  | yes                  |
| 31            | Enasidenib mesylate   | 3.5                    | 2017                | no          | no                    | no                  | yes                     | yes                  | yes             | no                   | no                   |
| 32            | Idelalisib            | 3.0                    | 2014                | yes         | no                    | no                  | yes                     | yes                  | yes             | yes                  | yes                  |
| 33            | Ceritinib             | 2.0                    | 2014                | yes         | no                    | no                  | yes                     | no                   | no              | yes                  | yes                  |
| 34            | Encorafenib           | 1.4                    | 2018                | yes         | no                    | no                  | yes                     | no                   | no              | no                   | no                   |
| 35            | Binimetinib           | 1.4                    | 2018                | yes         | no                    | no                  | yes                     | no                   | no              | no                   | no                   |
| 36            | Panobinostat lactate  | 1.2                    | 2015                | yes         | no                    | no                  | yes                     | no                   | yes             | no                   | yes                  |
| 37            | Vandetanib            | 1.1                    | 2011                | yes         | no                    | no                  | yes                     | yes                  | yes             | NA                   | no                   |
| 38            | Cobimetinib fumarate  | 1.1                    | 2015                | yes         | yes                   | no                  | yes                     | yes                  | yes             | no                   | no                   |
| 39            | Sonidegib phosphate   | 0.9                    | 2015                | no          | no                    | no                  | no                      | no                   | no              | no                   | no                   |
| 40            | Ivosidenib            | 0.8                    | 2018                | no          | no                    | no                  | yes                     | yes                  | yes             | no                   | no                   |
| 41            | Lorlatinib            | 0.2                    | 2018                | no          | no                    | no                  | yes                     | no                   | yes             | yes                  | yes                  |
| 42            | Larotrectinib         | 0.1                    | 2018                | no          | no                    | no                  | yes                     | no                   | yes             | yes                  | yes                  |
| 43            | Talazoparib tosylate  | 0.0                    | 2018                | yes         | no                    | no                  | no                      | no                   | yes             | no                   | no                   |
| 44            | Gilteritinib fumarate | 0.0                    | 2018                | no          | no                    | no                  | yes                     | yes                  | yes             | no                   | no                   |

Note: \*Oral targeted cancer drugs with only cancer indications; spending= sum of total gross payment associated with dispensings; OS=evidence of overall survival benefit by end of 2018; OS primary endpoint= OS was the primary endpoint in label-reported pivotal RCTs by the end of 2018, NA= not applicable, approval prior to Breakthrough Designation option (2012)

**eTable 6.** Number of members\* per year in the IBM MarketScan Research Databases, 2011-2018.

| <b>Year</b> | <b>Commercial</b> | <b>Supplementary<br/>Medicare</b> | <b>Grand Total</b> |
|-------------|-------------------|-----------------------------------|--------------------|
| 2011        | 55,559,154        | 5,243,029                         | 60,802,183         |
| 2012        | 56,466,708        | 4,922,604                         | 61,389,312         |
| 2013        | 44,180,771        | 4,272,760                         | 48,453,531         |
| 2014        | 47,258,528        | 3,868,830                         | 51,127,358         |
| 2015        | 28,348,363        | 2,199,633                         | 30,547,996         |
| 2016        | 27,895,445        | 2,098,522                         | 29,993,967         |
| 2017        | 26,146,275        | 1,473,787                         | 27,620,062         |
| 2018        | 27,685,469        | 1,076,854                         | 28,762,323         |

Note: \*calculated as sum of unique patient identifiers in a given year.

**eFigure 1.** Annual and cumulative numbers of patients exposed to and spending on 44 oral targeted cancer drugs, by FDA orphan designation and accelerated approval pathway.

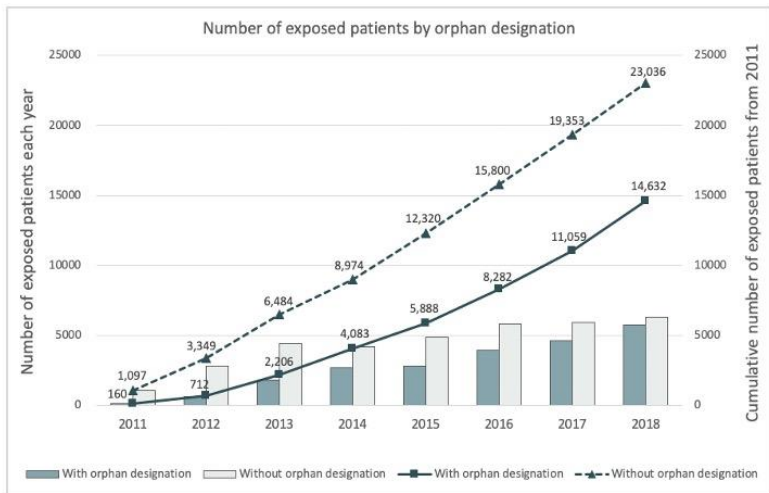

**a. Annual and cumulative numbers of patients by orphan designation**

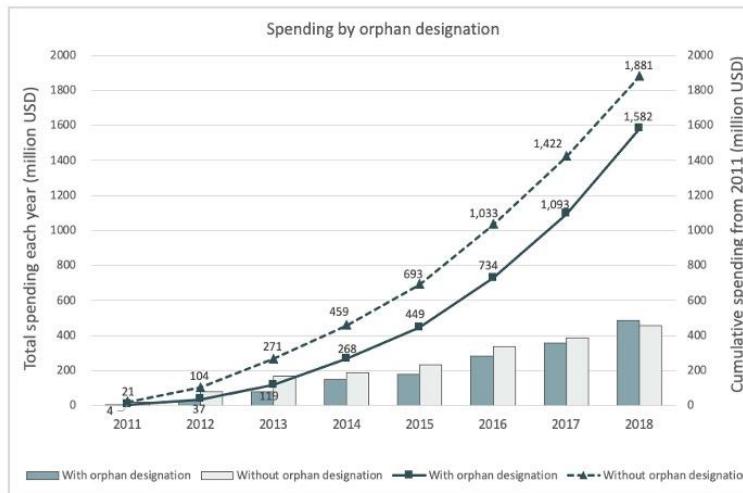

**b. Annual and cumulative spending by orphan designation**

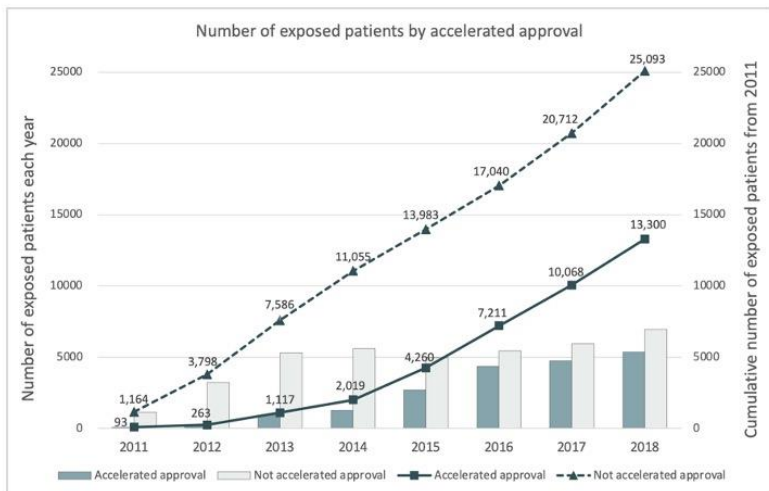

**c. Annual and cumulative numbers of patients by accelerated approval**

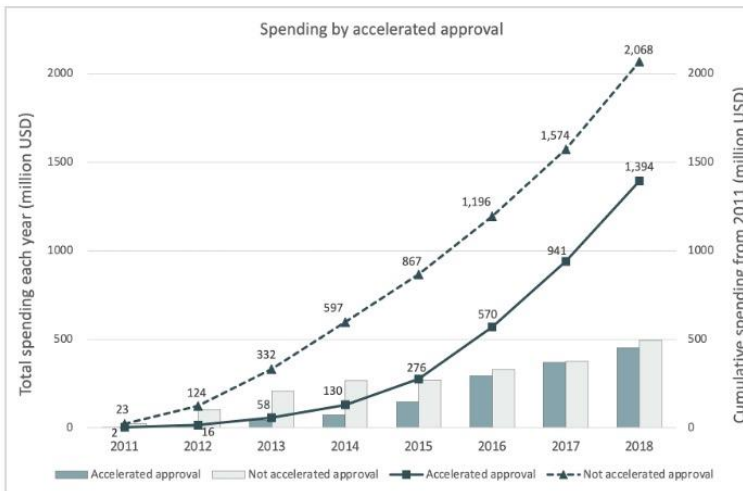

**d. Annual and cumulative spending by accelerated approval**

**eFigure 2.** Annual and cumulative inflation-adjusted spending on 44 oral targeted cancer drugs.

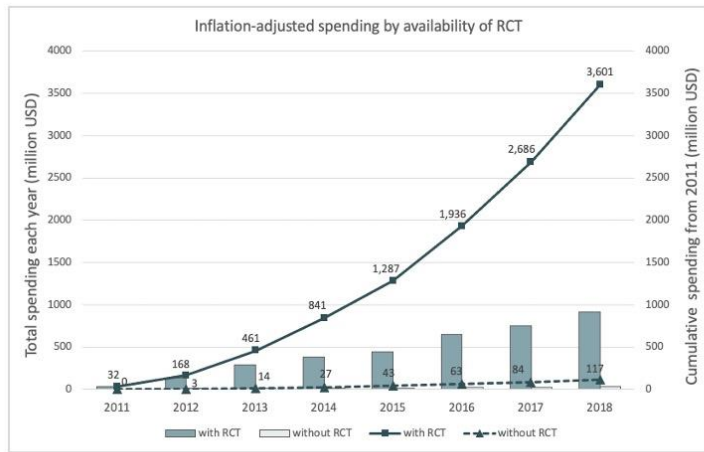

**a. Annual and cumulative inflation-adjusted spending by availability of RCT evidence**

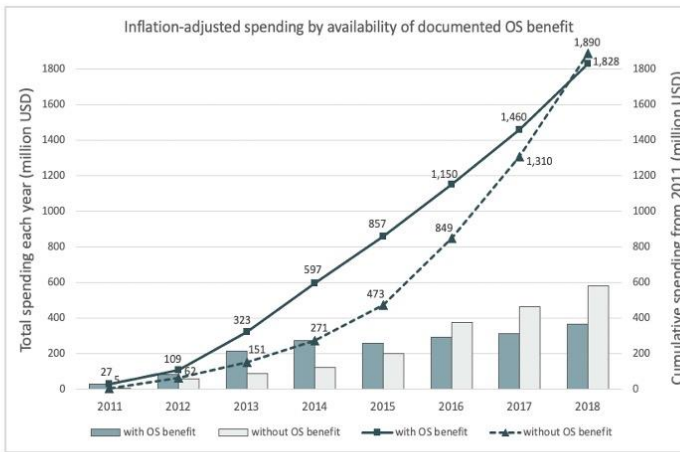

**b. Annual and cumulative inflation-adjusted spending by availability of OS benefit evidence**

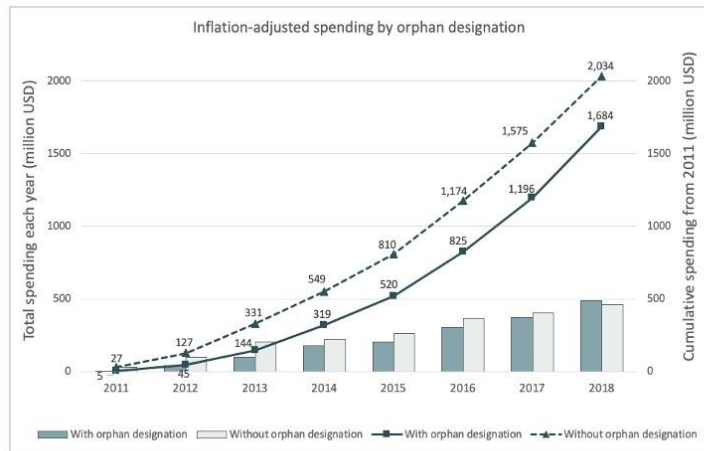

**c. Annual and cumulative inflation-adjusted spending by orphan designation**

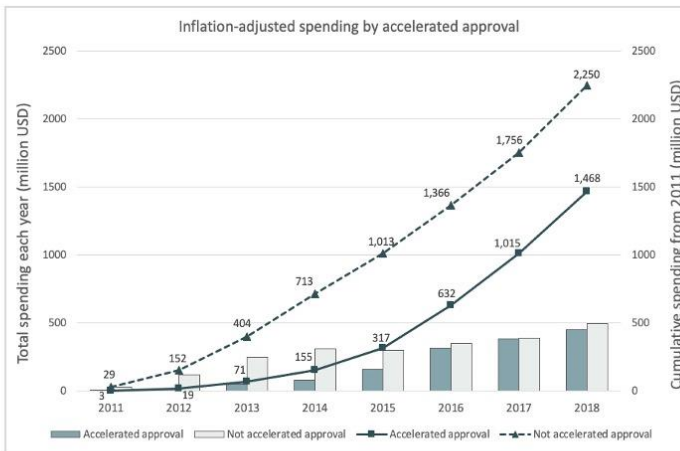

**d. Annual and cumulative inflation-adjusted spending by accelerated approval**

Note: RCT=at least one randomized controlled trial supporting approval for at least one indication by end of 2018, OS=evidence of overall survival benefit by end of 2018; we adjusted the spending to 2018 using Consumer Price Index (CPI) for prescription drugs, obtained from the U.S. Bureau of Labor Statistics<sup>2</sup>

<sup>2</sup> U.S. Bureau of Labor Statistics. Prescription drugs in U.S. city average, all urban consumers, not seasonally adjusted. Accessed August 9, 2021. Available from: <https://beta.bls.gov/dataViewer/view/timeseries/CUUR0000SEMF01>.

**eBox 1.** Brief summary of the evidence documented in FDA labels for the top 3 drugs by spending in 2018.

**Palbociclib** was approved to treat (HER2)-negative advanced or metastatic breast cancer in February 2015. Approval was supported by a pivotal RCT with 84 patients (intervention arm) with PFS as outcome measure. By the end of 2018, palbociclib was shown to prolong PFS by an average of 5 to 10 months, supported by 2 RCTs with 791 patients; OS data were not mature.

**Abiraterone** was approved to treat metastatic prostate cancer in April 2011. Approval was supported by 2 pivotal RCTs with 1,343 patients with an average of 5 months increased OS. Efficacy and safety of abiraterone were demonstrated in 3 RCTs with 1,940 patients by the end of 2018.

**Ruxolitinib** was approved to treat intermediate or high-risk myelofibrosis in November 2011. Approval was supported by 2 RCTs with 528 patients with reduction in spleen volume as outcome measures. By the end of 2018, ruxolitinib was shown to reduce spleen volume in patients with myelofibrosis and polycythemia vera, supported by 3 RCTs with 750 patients; numerical OS data on the basis of 2 RCT with patients with myelofibrosis were inconclusive.
